# Supplementary material for: Trypanosomatid parasite dynamically changes the transcriptome during infection and modifies honey bee physiology
Source: PubMed Central journal article supplement (PMC6994608; doi:10.1038/s42003-020-0775-x), 2020-01-31
Supplement: 42003_2020_775_MOESM1_ESM.pdf [file 42003_2020_775_MOESM1_ESM.pdf]

**a**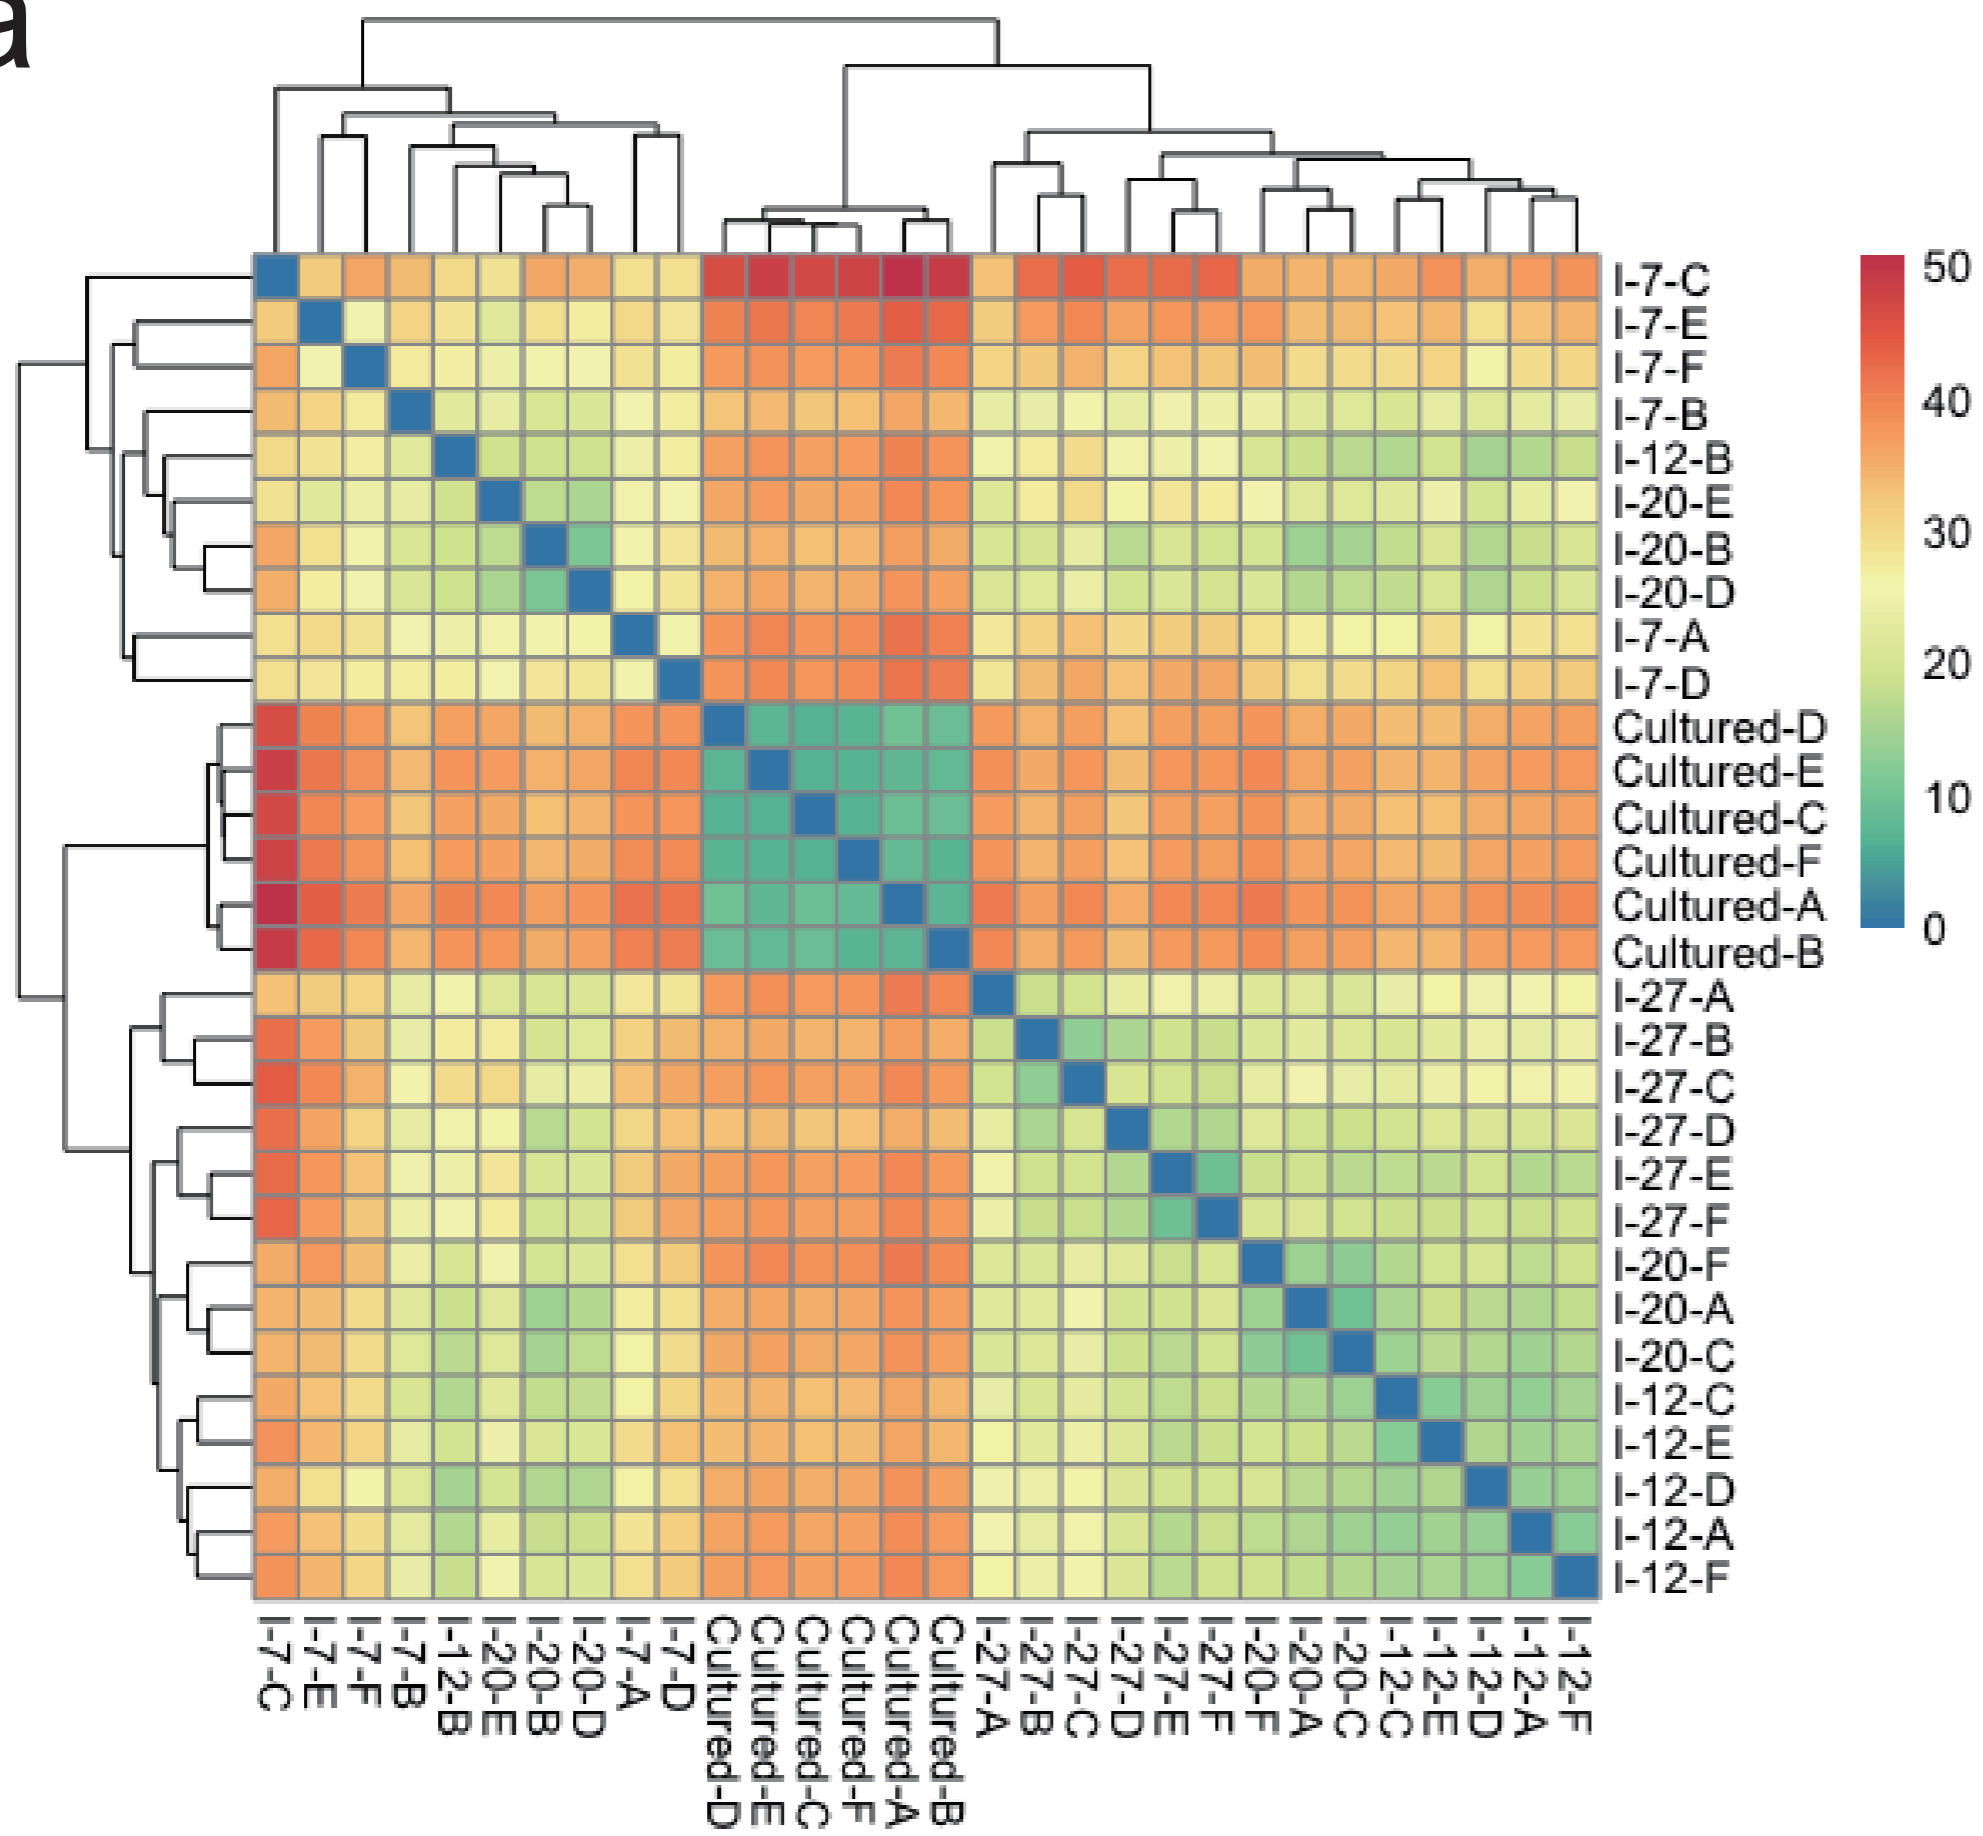**b**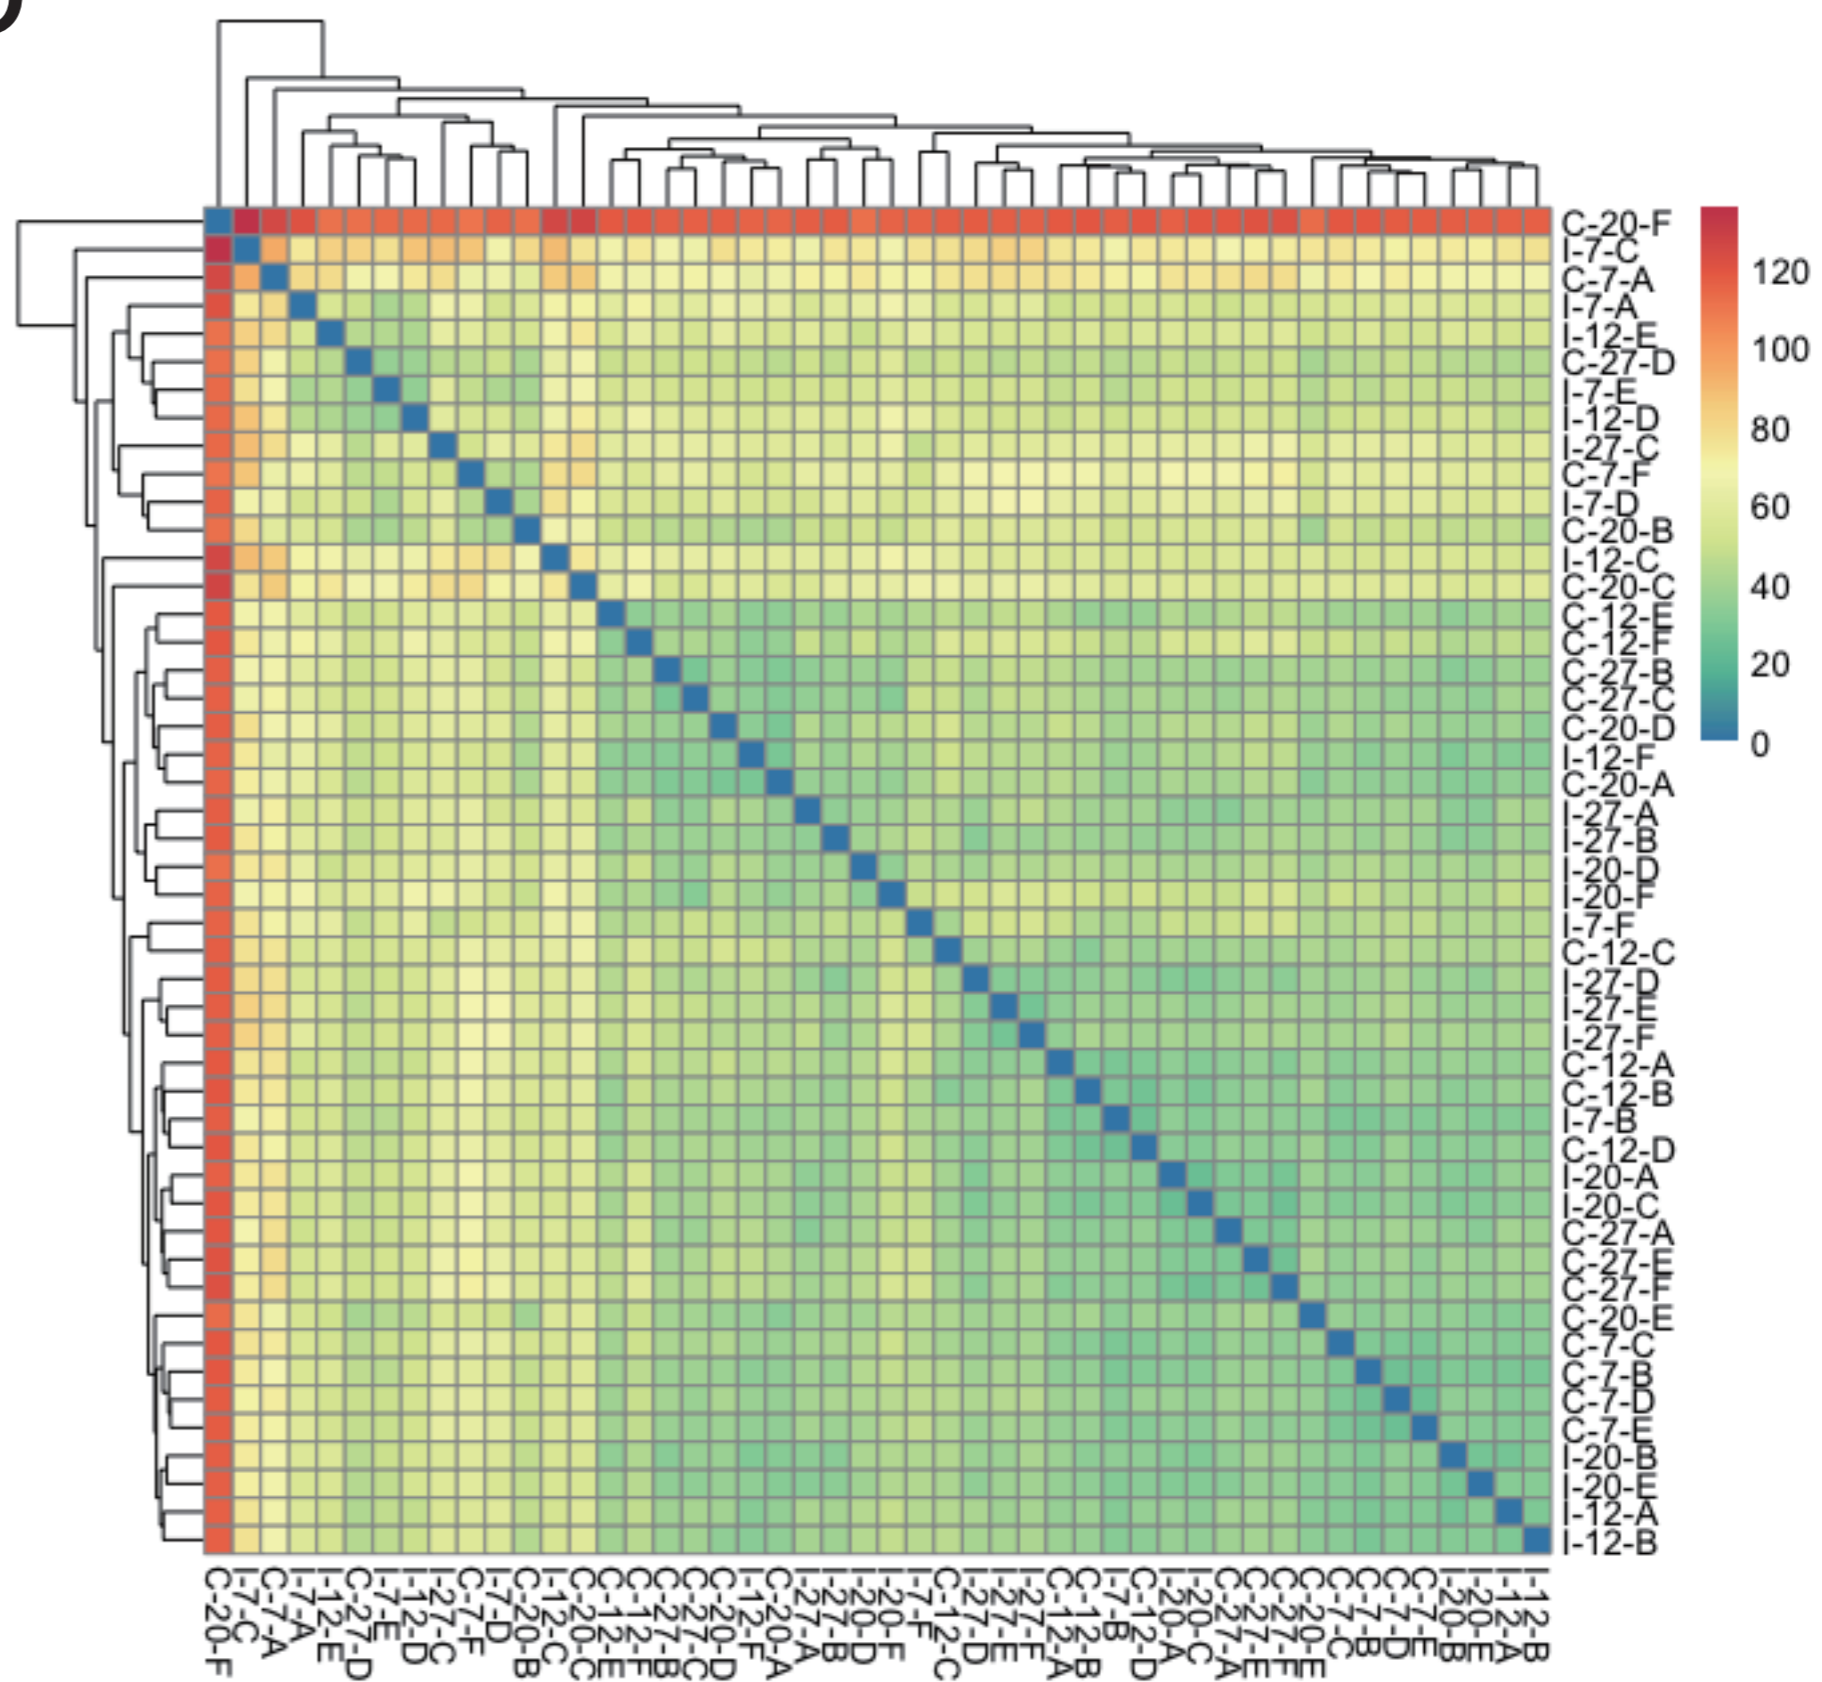

## **Supplementary Figure 1. Variation in *L. passim* and honey bee transcriptomic profiles**

Heat maps to show the results of hierarchical analysis of 30 *L. passim* (a) and 48 honey bee (b) transcriptomes using Pearson correlation. The levels of difference between samples are indicated by different colors.

### **Supplementary Methods**

Hierarchical analysis of the RNA-seq samples was conducted by DESeq2 (Version 1.22.1) and the Pearson correlation-based heat map was visualized using the gplots pheatmap.2 function to show distances between the RNA-seq (transcriptome) samples<sup>1</sup>.

### **Supplementary References**

1. Love, M. I., Huber, W. & Anders, S. Moderated estimation of fold change and dispersion for RNA-seq data with DESeq2. *Genome Biol.* **15**, 550 (2014).
